# Supplementary material for: Behavioral differences among domestic cats in the response to cat-attracting plants and their volatile compounds reveal a potential distinct mechanism of action for actinidine
Source: BMC Biol. 2022 Aug 25;20:192. doi: 10.1186/s12915-022-01369-1 (PMC9414117; doi:10.1186/s12915-022-01369-1)
Supplement: Supplementary file 5 — Additional file 5. This file contains the raw data from the plant, single compound, and habituation / dishabituation experiments, as well as the BORIS analyses (plants and single compounds). [file 12915_2022_1369_MOESM5_ESM.xlsx]

## Sheet: plants
plant	day	minute	cat	duration (sec.)	catnip brand
A. indica	1	2	N	124
A. indica	1	2	O	66
A. indica	1	11	A	210
A. indica	1	16	A	12
A. indica	1	40.167	V	5
A. indica	1	40.167	V	86
A. indica	1	91.334	Z	36
A. indica	1	363.67	A	13
A. indica	1	371.837	H	10
A. indica	1	553.672	V	79
A. indica	1	579.839	O	29
A. indica	1	580.839	O	45
A. indica	2	1	N	90
A. indica	2	1	O	54
A. indica	2	7	V	38
A. indica	2	13	O	31
A. indica	2	217.002	H	37
A. indica	2	307.503	A	11
A. indica	2	314.503	A	48
A. indica	2	584.839	O	39
A. indica	2	589.839	O	67
A. indica	2	604.006	N	72
A. indica	3	1	V	3
A. indica	3	2	V	89
A. indica	3	2	O	154
A. indica	3	9	A	130
A. indica	3	68.334	N	50
A. indica	3	71.334	N	71
A. indica	3	114.501	H	10
A. indica	3	580.839	O	49
A. indica	3	581.839	O	77
A. indica	3	599.006	N	58
A. indica	4	1	O	94
A. indica	4	4	N	99
A. indica	4	8	A	8
A. indica	4	9	A	83
A. indica	4	31	N	42
A. indica	4	545.672	O	87
A. indica	4	547.672	O	91
A. indica	4	610.006	N	21
A. indica	5	1	N	117
A. indica	5	2	O	78
A. indica	5	14	A	77
A. indica	5	166.835	H	19
A. indica	5	437.171	A	6
A. indica	5	438.171	A	23
A. indica	5	494.338	O	24
A. indica	5	584.839	N	93
A. indica negative control	6	0	V	24
A. indica	6	1	O	105
A. indica	6	1	V	23
A. indica	6	1	N	81
A. indica	6	6	V	41
A. indica	6	18	A	104
A. indica	6	21	A	43
A. indica	6	386.837	A	13
A. indica	6	387.837	A	3
A. indica	6	480.338	O	51
A. indica	6	484.338	O	40
A. indica	6	547.672	A	20
A. indica	6	579.839	N	23
A. indica negative control	7	2	V	11
A. indica	7	3	V	7
A. indica	7	3	N	117
A. indica	7	3	O	57
A. indica	7	27	H	1
A. indica	7	86.334	V	110
A. indica	7	421.004	N	97
A. indica	7	438.171	A	9
A. indica	7	569.839	O	42
A. indica	8	1	V	67
A. indica	8	4	Z	26
A. indica	8	18	N	97
A. indica	8	25	N	6
A. indica	8	81.334	A	114
A. indica	8	109.501	H	28
A. indica	8	511.505	O	54
A. indica	8	517.505	O	19
A. indica	8	518.505	O	59
A. indica	9	3	H	64
A. indica	9	15	O	68
A. indica	9	17	A	5
A. indica	9	23	N	26
A. indica	9	98.334	N	90
A. indica	9	100.501	N	25
A. indica	9	144.668	A	28
A. indica	9	515.505	N	80
A. indica	10	2	N	141
A. indica	10	3	V	47
A. indica	10	8	A	27
A. indica negative control	10	10	O	25
A. indica	10	292.336	H	26
A. indica	10	484.338	A	5
A. indica	10	549.672	O	64
A. indica	10	550.672	O	42
A. indica	10	585.839	N	3
A. polygama	1	9	Z	21
A. polygama	1	13	O	179
A. polygama negative control	1	16	O	7
A. polygama	1	27	A	268
A. polygama	1	33	V	3
A. polygama negative control	1	33.167	V	48
A. polygama	1	34.167	H	238
A. polygama negative control	1	44	V	10
A. polygama	1	44.167	V	56
A. polygama	1	46.167	H	144
A. polygama	1	59.167	H	94
A. polygama negative control	1	119.501	V	17
A. polygama	1	121.501	V	24
A. polygama	1	140.668	N	22
A. polygama	1	158.668	A	42
A. polygama	1	328.503	A	199
A. polygama	1	333.67	A	73
A. polygama	1	340.67	H	4
A. polygama	1	453.171	H	105
A. polygama	1	472.338	H	5
A. polygama	1	475.338	O	22
A. polygama	1	491.338	V	18
A. polygama	1	503.505	O	21
A. polygama	1	504.505	O	4
A. polygama	1	527.505	A	11
A. polygama	1	577.839	H	10
A. polygama	2	3	O	144
A. polygama	2	3	N	149
A. polygama negative control	2	8	V	17
A. polygama	2	150.668	H	146
A. polygama	2	298.503	A	57
A. polygama	2	300.503	A	94
A. polygama	2	421.004	H	160
A. polygama	2	532.672	O	112
A. polygama	2	568.839	N	180
A. polygama	3	3	O	12
A. polygama	3	4	N	110
A. polygama	3	27	O	9
A. polygama	3	28	O	75
A. polygama	3	32	H	118
A. polygama	3	38.167	H	14
A. polygama	3	165.835	V	12
A. polygama	3	305.503	A	36
A. polygama	3	414.004	H	7
A. polygama	3	527.505	N	103
A. polygama	3	536.672	O	102
A. polygama	4	3	H	8
A. polygama negative control	4	11	V	35
A. polygama	4	15	O	122
A. polygama	4	45.167	H	152
A. polygama	4	391.837	A	101
A. polygama	4	431.171	O	17
A. polygama	4	461.171	Z	49
A. polygama	4	529.505	Z	98
A. polygama	5	11	H	41
A. polygama negative control	5	106.501	H	7
A. polygama	5	139.668	H	117
A. polygama	5	410.004	A	38
A. polygama	5	576.839	O	67
A. polygama	5	581.839	Z	27
A. polygama	6	2	O	149
A. polygama	6	2	N	187
A. polygama	6	19	N	36
A. polygama	6	21	O	14
A. polygama	6	24	V	49
A. polygama	6	26	V	4
A. polygama	6	69.334	H	185
A. polygama	6	77.334	N	53
A. polygama	6	78.334	N	2
A. polygama	6	128.501	A	171
A. polygama	6	134.668	H	96
A. polygama	6	471.338	O	52
A. polygama	6	472.338	O	84
A. polygama	7	2	O	75
A. polygama	7	8	N	46
A. polygama	7	9	A	138
A. polygama	7	12	O	9
A. polygama	7	19	H	107
A. polygama	7	44.167	A	167
A. polygama	7	289.336	A	7
A. polygama	7	306.503	H	122
A. polygama	7	547.672	O	88
A. polygama	7	602.006	H	7
A. polygama	8	2	N	107
A. polygama	8	2	O	130
A. polygama	8	9	V	7
A. polygama negative control	8	9	V	25
A. polygama	8	16	O	66
A. polygama	8	32	H	109
A. polygama	8	131.501	Z	35
A. polygama	8	143.668	Z	19
A. polygama	8	219.002	A	80
A. polygama	8	540.672	N	10
A. polygama	8	541.672	N	51
A. polygama	8	546.672	H	21
A. polygama	9	1	O	99
A. polygama	9	9	N	203
A. polygama	9	11	V	55
A. polygama negative control	9	11	V	46
A. polygama	9	20	H	101
A. polygama	9	30	H	15
A. polygama	9	33.167	H	160
A. polygama	9	42.167	N	8
A. polygama	9	43.167	N	13
A. polygama	9	62.167	Z	12
A. polygama	9	440.171	O	56
A. polygama	9	506.505	A	83
A. polygama	9	600.006	N	22
A. polygama	9	607.006	N	53
A. polygama	10	1	O	31
A. polygama	10	7	N	145
A. polygama	10	10	N	2
A. polygama	10	17	O	65
A. polygama	10	59.167	H	4
A. polygama	10	72.334	V	10
A. polygama negative control	10	73.334	V	21
A. polygama	10	81.334	A	57
A. polygama	10	601.006	N	82
A. polygama	10	604.006	N	3
L. tatarica	1	3	O	218
L. tatarica	1	8	N	136
L. tatarica	1	15	H	35
L. tatarica	1	39.167	H	84
L. tatarica	1	153.668	H	32
L. tatarica	1	203.002	A	59
L. tatarica	1	234.169	Z	27
L. tatarica	1	262.169	N	71
L. tatarica	1	303.503	V	47
L. tatarica	1	305.503	V	26
L. tatarica	1	320.503	O	94
L. tatarica	1	322.503	O	111
L. tatarica	1	380.837	H	2
L. tatarica	1	418.004	V	68
L. tatarica	1	487.338	Z	2
L. tatarica	2	3	O	230
L. tatarica	2	3	V	66
L. tatarica	2	18	N	78
L. tatarica	2	21	O	150
L. tatarica	2	69.334	V	37
L. tatarica	2	83.334	H	44
L. tatarica	2	125.501	V	35
L. tatarica	2	252.169	O	132
L. tatarica	2	579.839	N	102
L. tatarica	3	3	O	239
L. tatarica	3	3	N	91
L. tatarica	3	104.501	H	85
L. tatarica	3	115.501	V	29
L. tatarica	3	117.501	V	33
L. tatarica	3	124.501	A	59
L. tatarica	3	599.006	N	99
L. tatarica	3	599.006	O	57
L. tatarica	4	4	O	228
L. tatarica	4	16	O	154
L. tatarica	4	23	N	101
L. tatarica	4	29	N	21
L. tatarica	4	24	H	57
L. tatarica	4	171.835	A	57
L. tatarica	4	173.835	H	56
L. tatarica	4	177.835	A	87
L. tatarica	5	3	O	117
L. tatarica	5	11	H	58
L. tatarica	5	22	O	10
L. tatarica	5	88.334	N	51
L. tatarica	5	89.334	N	46
L. tatarica	5	197.835	A	76
L. tatarica	5	200.002	A	12
L. tatarica	5	451.171	H	5
L. tatarica	6	3	O	95
L. tatarica	6	7	N	79
L. tatarica	6	9	O	8
L. tatarica	6	11	A	99
L. tatarica	6	14	N	66
L. tatarica	6	257.169	A	23
L. tatarica	6	484.338	Z	38
L. tatarica	6	534.672	O	127
L. tatarica	7	3	O	188
L. tatarica	7	3	N	171
L. tatarica	7	11	N	2
L. tatarica	7	229.002	H	189
L. tatarica	7	237.169	H	84
L. tatarica	7	252.169	A	45
L. tatarica	7	416.004	O	29
L. tatarica	7	479.338	V	60
L. tatarica	7	481.338	V	11
L. tatarica	7	514.505	O	34
L. tatarica	7	515.505	O	31
L. tatarica	8	3	O	240
L. tatarica	8	9	A	58
L. tatarica	8	11	N	138
L. tatarica	8	190.835	A	8
L. tatarica	8	192.835	H	141
L. tatarica	8	545.672	O	90
L. tatarica	9	3	O	131
L. tatarica	9	8	H	114
L. tatarica	9	21	A	217
L. tatarica	9	22	O	104
L. tatarica	9	34.167	A	45
L. tatarica	9	386.837	H	30
L. tatarica	9	446.171	Z	34
L. tatarica	9	531.672	Z	16
L. tatarica	9	555.672	Z	117
L. tatarica	10	3	O	57
L. tatarica	10	5	N	86
L. tatarica	10	15	V	79
L. tatarica negative control	10	18	V	12
L. tatarica	10	31	O	49
L. tatarica	10	68.334	H	23
L. tatarica	10	73.334	A	68
L. tatarica	10	453.171	H	4
L. tatarica	10	520.505	O	45
L. tatarica	10	556.672	Z	28
L. tatarica	10	602.006	V	34
L. tatarica	10	603.006	N	36
N. cataria	1	1	O	124	SK
N. cataria	1	1	N	24	F
N. cataria	1	12	O	16	SK
N. cataria	1	14	O	52	F
N. cataria	1	23	H	30	F
N. cataria	1	27	O	3	F
N. cataria	1	29	A	38	SK
N. cataria	1	58	H	4	F
N. cataria	1	89	V	94	F
N. cataria	1	134	H	12	F
N. cataria	1	167	O	3	SK
N. cataria	1	168	O	23	F
N. cataria	1	200	H	13	F
N. cataria	1	206	Z	28	F
N. cataria	1	250	A	19	F
N. cataria	1	421	V	44	F
N. cataria	2	3	O	69	F
N. cataria	2	11	O	128	SK
N. cataria	2	19	H	17	F
N. cataria	2	73	O	70	F
N. cataria	2	86	O	124	SK
N. cataria	2	103	V	29	F
N. cataria	2	154	N	59	F
N. cataria	2	156	N	13	SK
N. cataria	2	198	A	97	SK
N. cataria	2	488	H	4	SK
N. cataria	2	499	H	5	SK
N. cataria	2	501	H	30	F
N. cataria	2	570	O	54	F
N. cataria	3	1	O	71	F
N. cataria	3	11	O	11	SK
N. cataria	3	16	O	71	F
N. cataria	3	49	N	121	SK
N. cataria	3	159	V	91	SK
N. cataria	3	220	H	63	F
N. cataria	3	287	A	36	SK
N. cataria	3	347	V	12	F
N. cataria	3	433	Z	55	SK
N. cataria	3	491	A	16	SK
N. cataria	3	492	A	188	F
N. cataria	3	497	A	9	SK
N. cataria	3	520	Z	54	F
N. cataria	3	568	O	56	F
N. cataria	4	2	N	41	SK
N. cataria	4	2	O	130	F
N. cataria	4	5	O	56	SK
N. cataria	4	9	H	1	SK
N. cataria	4	41	N	11	F
N. cataria	4	427	A	27	F
N. cataria	4	581	O	38	F
N. cataria	5	2	N	163	SK
N. cataria	5	3	O	105	F
N. cataria	5	61	H	32	SK
N. cataria	5	314	A	30	F
N. cataria	5	316	A	30	SK
N. cataria	5	329	A	1	SK
N. cataria	5	581	H	4	F
N. cataria	5	600	A	11	SK
N. cataria	6	1	O	145	F
N. cataria	6	2	N	113	SK
N. cataria	6	121	A	58	F
N. cataria	6	123	A	107	SK
N. cataria	6	329	O	84	F
N. cataria	6	465	O	31	SK
N. cataria	6	546	Z	15	F
N. cataria	6	591	V	37	F
N. cataria	6	596	O	61	F
N. cataria	6	598	A	7	SK
N. cataria	7	1	O	80	F
N. cataria	7	7	H	57	SK
N. cataria	7	29	O	72	F
N. cataria	7	40	N	32	SK
N. cataria	7	42	N	62	F
N. cataria	7	53	V	13	SK
N. cataria	7	54	V	30	F
N. cataria	7	112	N	52	SK
N. cataria	7	199	N	146	F
N. cataria	7	296	H	12	F
N. cataria	7	523	Z	7	SK
N. cataria	7	532	Z	21	F
N. cataria	8	1	O	161	F
N. cataria	8	21	H	18	SK
N. cataria	8	123	H	89	F
N. cataria	8	131	H	1	SK
N. cataria	8	263	A	9	SK
N. cataria	8	264	A	22	F
N. cataria	8	418	O	56	F
N. cataria	8	570	N	81	F
N. cataria	8	583	N	1	F
N. cataria	8	584	N	7	SK
N. cataria	9	3	O	107	F
N. cataria	9	3	N	84	SK
N. cataria	9	15	O	20	SK
N. cataria	9	145	A	12	SK
N. cataria	9	162	A	2	SK
N. cataria	9	164	A	249	F
N. cataria	9	188	V	35	SK
N. cataria negative control	9	189	V	32
N. cataria	9	250	Z	63	SK
N. cataria	9	407	H	139	F
N. cataria	9	501	A	5	SK
N. cataria	9	516	O	50	F
N. cataria	9	517	O	10	SK
N. cataria	10	1	O	217	F
N. cataria	10	1	N	201	SK
N. cataria	10	56	A	22	F
N. cataria	10	57	A	23	SK
N. cataria	10	191	H	10	F
N. cataria	10	464	A	42	F
N. cataria	10	465	A	24	SK
N. cataria	10	512	O	28	F
N. cataria	10	607	N	47	F
V. officinalis	1	19	O	94
V. officinalis	1	30	O	2
V. officinalis	1	34	V	37
V. officinalis	1	146	A	214
V. officinalis	1	151	A	43
V. officinalis	1	292	A	9
V. officinalis	1	509	O	18
V. officinalis	1	510	V	24
V. officinalis	1	512	V	14
V. officinalis	2	1	O	68
V. officinalis	2	3	O	27
V. officinalis	2	24	N	47
V. officinalis	2	53	O	74
V. officinalis	2	213	A	12
V. officinalis	2	215	A	99
V. officinalis	2	218	A	7
V. officinalis	2	552	O	28
V. officinalis	3	2	V	24
V. officinalis	3	4	V	229
V. officinalis	3	4	A	162
V. officinalis	3	527	O	34
V. officinalis	4	6	O	59
V. officinalis	4	12	V	60
V. officinalis	4	55	N	38
V. officinalis	4	122	A	21
V. officinalis	5	2	N	76
V. officinalis	5	3	O	86
V. officinalis	5	23	A	40
V. officinalis	5	24	A	9
V. officinalis negative control	5	34	V	21
V. officinalis	5	49	N	1
V. officinalis	5	55	N	3
V. officinalis	5	354	O	74
V. officinalis	6	3	N	4
V. officinalis	6	4	O	109
V. officinalis	6	7	N	69
V. officinalis	6	17	V	162
V. officinalis	6	105	A	31
V. officinalis	6	219	N	163
V. officinalis	6	224	N	13
V. officinalis	7	1	N	92
V. officinalis	7	2	V	38
V. officinalis	7	3	N	10
V. officinalis	7	28	A	51
V. officinalis	7	29	A	64
V. officinalis	7	45	N	22
V. officinalis	7	47	N	18
V. officinalis	7	240	V	22
V. officinalis negative control	7	241	V	10
V. officinalis	7	533	O	71
V. officinalis	8	1	N	98
V. officinalis	8	11	V	13
V. officinalis negative control	8	12	V	8
V. officinalis	8	20	O	73
V. officinalis	8	410	N	9
V. officinalis	8	447	O	41
V. officinalis	9	2	V	40
V. officinalis	9	4	N	92
V. officinalis	9	10	N	3
V. officinalis	9	557	O	31
V. officinalis	10	1	V	26
V. officinalis	10	1	O	108
V. officinalis	10	5	A	277
V. officinalis	10	30	N	42
V. officinalis	10	455	A	72
V. officinalis	10	457	A	1
V. officinalis	10	548	O	50

## Sheet: single compounds
date (YYYY-MM-DD)	compound no.	compound name	quantity (µg)	hours available	response start (min. since available)	cat	response duration (sec.)
2018-12-28	(1)	cis-trans-nepetalactone	33	1	0	O	16
2018-12-28	(1)	cis-trans-nepetalactone	33		26	V	22
2018-12-28	(1)	cis-trans-nepetalactone	33		33	V	16
2018-12-28	(1)	cis-trans-nepetalactone	100	4	38	O	15
2018-12-28	(1)	cis-trans-nepetalactone	100		53	N	38
2018-12-28	(1)	cis-trans-nepetalactone	100		219	O	36
2019-01-05	(1)	cis-trans-nepetalactone	100	4	0	O	74
2019-01-05	(1)	cis-trans-nepetalactone	100		100	A	61
2019-01-05	(1)	cis-trans-nepetalactone	100		166	V	10
2019-01-05	(1)	cis-trans-nepetalactone	100		213	O	28
2019-01-05	(1)	cis-trans-nepetalactone	100		237	Z	17
2019-01-05	(1)	cis-trans-nepetalactone	300	4	3	A	34
2019-01-05	(1)	cis-trans-nepetalactone	300		8	N	113
2019-01-05	(1)	cis-trans-nepetalactone	300		107	O	17
2019-01-05	(1)	cis-trans-nepetalactone	900	4	37	V	33
2019-01-05	(1)	cis-trans-nepetalactone	900		72	N	146
2019-01-05	(1)	cis-trans-nepetalactone	900		162	O	175
2019-01-05	(1)	cis-trans-nepetalactone	900		183	A	98
2019-05-01	(2)	trans-cis-nepetalactone	33	1	8	A	1
2019-05-01	(2)	trans-cis-nepetalactone	100	4	10	O	209
2019-05-05	(2)	trans-cis-nepetalactone	100	4	1	O	71
2019-05-05	(2)	trans-cis-nepetalactone	100		97	O	9
2019-05-05	(2)	trans-cis-nepetalactone	100		134	V	12
2019-05-05	(2)	trans-cis-nepetalactone	300	4	1	V	128
2019-05-05	(2)	trans-cis-nepetalactone	300		100	O	81
2019-05-05	(2)	trans-cis-nepetalactone	900	4	4	A	10
2019-05-05	(2)	trans-cis-nepetalactone	900		200	O	110
2019-06-15	(2)	trans-cis-nepetalactone	33	1	0	V	32
2019-06-15	(2)	trans-cis-nepetalactone	33		6	V	1
2019-06-15	(2)	trans-cis-nepetalactone	33		7	N	1
2019-06-15	(2)	trans-cis-nepetalactone	33		45	A	2
2019-06-15	(2)	trans-cis-nepetalactone	100	4	35	O	90
2019-06-15	(2)	trans-cis-nepetalactone	100		127	O	51
2019-06-15	(2)	trans-cis-nepetalactone	100		171	V	30
2019-06-15	(2)	trans-cis-nepetalactone	100		204	O	49
2019-06-19	(2)	trans-cis-nepetalactone	100	4	0	O	153
2019-06-19	(2)	trans-cis-nepetalactone	100		0	V	84
2019-06-19	(2)	trans-cis-nepetalactone	100		174	O	2
2019-06-19	(2)	trans-cis-nepetalactone	300	4	3	O	35
2019-06-19	(2)	trans-cis-nepetalactone	300		184	O	49
2019-06-19	(2)	trans-cis-nepetalactone	300		200	O	2
2019-06-19	(2)	trans-cis-nepetalactone	900	4	17	O	121
2019-06-19	(2)	trans-cis-nepetalactone	900		20	A	238
2019-06-19	(2)	trans-cis-nepetalactone	900		228	A	6
2019-06-19	(2)	trans-cis-nepetalactone	900		236	N	110
2018-12-28	(3)	dihydronepetalactone	33	1	2	O	34
2018-12-28	(3)	dihydronepetalactone	33		32	V	29
2018-12-28	(3)	dihydronepetalactone	33		59	Z	1
2018-12-28	(3)	dihydronepetalactone	100	4	7	O	29
2018-12-28	(3)	dihydronepetalactone	100		39	O	53
2018-12-28	(3)	dihydronepetalactone	100		46	N	1
2018-12-28	(3)	dihydronepetalactone	100		217	N	3
2018-12-28	(3)	dihydronepetalactone	100		220	O	6
2019-01-13	(3)	dihydronepetalactone	100	4	1	A	53
2019-01-13	(3)	dihydronepetalactone	100		4	O	2
2019-01-13	(3)	dihydronepetalactone	100		7	V	11
2019-01-13	(3)	dihydronepetalactone	100		11	A	19
2019-01-13	(3)	dihydronepetalactone	100		71	O	2
2019-01-13	(3)	dihydronepetalactone	100		75	Z	62
2019-01-13	(3)	dihydronepetalactone	100		76	Z	94
2019-01-13	(3)	dihydronepetalactone	100		88	Z	109
2019-01-13	(3)	dihydronepetalactone	100		92	A	9
2019-01-13	(3)	dihydronepetalactone	100		97	A	67
2019-01-13	(3)	dihydronepetalactone	100		100	Z	25
2019-01-13	(3)	dihydronepetalactone	300	4	1	O	26
2019-01-13	(3)	dihydronepetalactone	300		25	A	8
2019-01-13	(3)	dihydronepetalactone	300		37	O	47
2019-01-13	(3)	dihydronepetalactone	300		46	N	60
2019-01-13	(3)	dihydronepetalactone	900	4	14	N	150
2019-01-13	(3)	dihydronepetalactone	900		108	O	62
2019-01-13	(3)	dihydronepetalactone	900		198	A	37
2019-01-13	(3)	dihydronepetalactone	900		224	O	34
2019-01-13	(3)	dihydronepetalactone	900		234	Z	50
2018-12-24	(4)	isodihydronepetalactone	33	1	0	O	60
2018-12-24	(4)	isodihydronepetalactone	33		8	V	18
2018-12-24	(4)	isodihydronepetalactone	100	4	5	N	127
2018-12-24	(4)	isodihydronepetalactone	100		18	O	31
2018-12-24	(4)	isodihydronepetalactone	100		50	V	83
2018-12-24	(4)	isodihydronepetalactone	100		89	O	84
2018-12-24	(4)	isodihydronepetalactone	100		98	O	8
2019-01-09	(4)	isodihydronepetalactone	100	4	0	O	135
2019-01-09	(4)	isodihydronepetalactone	100		177	N	4
2019-01-09	(4)	isodihydronepetalactone	100		193	O	24
2019-01-09	(4)	isodihydronepetalactone	300	4	2	A	15
2019-01-09	(4)	isodihydronepetalactone	300		31	V	27
2019-01-09	(4)	isodihydronepetalactone	300		34	N	138
2019-01-09	(4)	isodihydronepetalactone	300		146	A	10
2019-01-09	(4)	isodihydronepetalactone	900	4	0	V	29
2019-01-09	(4)	isodihydronepetalactone	900		3	O	117
2019-01-09	(4)	isodihydronepetalactone	900		6	O	4
2019-01-09	(4)	isodihydronepetalactone	900		97	O	35
2019-01-09	(4)	isodihydronepetalactone	900		231	O	49
2019-10-09	(5)	neonepetalactone	33	1	0	N	16
2019-10-09	(5)	neonepetalactone	33		5	V	12
2019-10-09	(5)	neonepetalactone	100	4	65	V	11
2019-10-09	(5)	neonepetalactone	100		93	N	7
2019-10-09	(5)	neonepetalactone	100		188	Z	33
2019-10-13	(5)	neonepetalactone	100	0.5	1	V	52
2019-10-19	(5)	neonepetalactone	100	4	1	N	48
2019-10-19	(5)	neonepetalactone	100		40	N	8
2019-10-19	(5)	neonepetalactone	100		125	Z	34
2019-10-19	(5)	neonepetalactone	100		205	V	30
2019-10-13	(5)	neonepetalactone	300	1	177	A	14
2019-10-13	(5)	neonepetalactone	300		192	Z	17
2019-10-19	(5)	neonepetalactone	300	4
2019-10-13	(5)	neonepetalactone	900	4	17	O	39
2019-10-13	(5)	neonepetalactone	900		38	N	1
2019-10-13	(5)	neonepetalactone	900		169	N	86
2019-10-09	(6)	isoneonepetalactone	33	1	0	O	21
2019-10-09	(6)	isoneonepetalactone	100	4	40	O	37
2019-10-09	(6)	isoneonepetalactone	100		64	V	11
2019-10-13	(6)	isoneonepetalactone	100	4	2	V	25
2019-10-13	(6)	isoneonepetalactone	100		136	V	41
2019-10-13	(6)	isoneonepetalactone	300	4	104	O	42
2019-10-13	(6)	isoneonepetalactone	300		179	A	20
2019-10-13	(6)	isoneonepetalactone	900	4	21	O	47
2019-10-13	(6)	isoneonepetalactone	900		54	V	1
2019-10-13	(6)	isoneonepetalactone	900		236	O	15
2018-12-24	(7)	iridomyrmecin	33	1	1	N	47
2018-12-24	(7)	iridomyrmecin	33		5	V	54
2018-12-24	(7)	iridomyrmecin	33		7	V	15
2018-12-24	(7)	iridomyrmecin	100	4	3	O	21
2018-12-24	(7)	iridomyrmecin	100		20	O	40
2018-12-24	(7)	iridomyrmecin	100		52	V	46
2019-01-05	(7)	iridomyrmecin	100	4	1	N	37
2019-01-05	(7)	iridomyrmecin	100		42	V	18
2019-01-05	(7)	iridomyrmecin	100		54	N	34
2019-01-05	(7)	iridomyrmecin	100		101	Z	6
2019-01-05	(7)	iridomyrmecin	100		107	V	33
2019-01-05	(7)	iridomyrmecin	300	4	5	N	35
2019-01-05	(7)	iridomyrmecin	900	4	0	V	53
2019-01-05	(7)	iridomyrmecin	900		17	O	34
2019-01-05	(7)	iridomyrmecin	900		41	V	20
2019-01-05	(7)	iridomyrmecin	900		180	A	70
2019-01-05	(7)	iridomyrmecin	900		185	A	46
2019-01-01	(8)	isoiridomyrmecin	33	1	8	Z	43
2019-01-01	(8)	isoiridomyrmecin	33		10	V	28
2019-01-01	(8)	isoiridomyrmecin	33		13	O	33
2019-01-01	(8)	isoiridomyrmecin	33		24	Z	24
2019-01-01	(8)	isoiridomyrmecin	33		33	A	8
2019-01-01	(8)	isoiridomyrmecin	33		34	N	16
2019-01-01	(8)	isoiridomyrmecin	33		48	N	151
2019-01-01	(8)	isoiridomyrmecin	100	4	13	N	24
2019-01-01	(8)	isoiridomyrmecin	100		35	Z	93
2019-01-01	(8)	isoiridomyrmecin	100		38	A	33
2019-01-01	(8)	isoiridomyrmecin	100		41	V	10
2019-01-01	(8)	isoiridomyrmecin	100		54	N	45
2019-01-01	(8)	isoiridomyrmecin	100		127	V	28
2019-01-01	(8)	isoiridomyrmecin	100		142	A	15
2019-01-01	(8)	isoiridomyrmecin	100		145	A	7
2019-01-01	(8)	isoiridomyrmecin	100		245	O	41
2019-01-13	(8)	isoiridomyrmecin	100	4	0	O	21
2019-01-13	(8)	isoiridomyrmecin	100		1	N	84
2019-01-13	(8)	isoiridomyrmecin	100		5	O	43
2019-01-13	(8)	isoiridomyrmecin	100		85	Z	78
2019-01-13	(8)	isoiridomyrmecin	100		95	A	72
2019-01-13	(8)	isoiridomyrmecin	100		142	V	19
2019-01-13	(8)	isoiridomyrmecin	300	4	1	V	61
2019-01-13	(8)	isoiridomyrmecin	300		45	N	5
2019-01-13	(8)	isoiridomyrmecin	300		77	N	14
2019-01-13	(8)	isoiridomyrmecin	900	4	12	N	22
2019-01-13	(8)	isoiridomyrmecin	900		33	V	21
2019-01-13	(8)	isoiridomyrmecin	900		107	N	6
2019-01-13	(8)	isoiridomyrmecin	900		118	O	19
2019-01-13	(8)	isoiridomyrmecin	900		157	O	2
2019-01-13	(8)	isoiridomyrmecin	900		194	A	17
2019-01-13	(8)	isoiridomyrmecin	900		219	Z	15
2019-01-13	(8)	isoiridomyrmecin	900		239	O	49
2019-01-01	(9)	actinidine	33	1	1	A	236
2019-01-01	(9)	actinidine	33		25	Z	22
2019-01-01	(9)	actinidine	33		34	A	73
2019-01-01	(9)	actinidine	33		37	N	9
2019-01-01	(9)	actinidine	100	4	7	A	173
2019-01-01	(9)	actinidine	100		47	A	158
2019-01-01	(9)	actinidine	100		140	A	32
2019-01-01	(9)	actinidine	100		143	A	98
2019-01-01	(9)	actinidine	100		188	A	42
2019-01-01	(9)	actinidine	100		194	A	2
2019-01-01	(9)	actinidine	100		197	A	21
2019-01-09	(9)	actinidine	100	4	32	A	186
2019-01-09	(9)	actinidine	100		36	A	5
2019-01-09	(9)	actinidine	100		72	Z	12
2019-01-09	(9)	actinidine	100		90	A	22
2019-01-09	(9)	actinidine	300	4	1	A	26
2019-01-09	(9)	actinidine	300		3	A	40
2019-01-09	(9)	actinidine	300		145	A	27
2019-01-09	(9)	actinidine	900	4	42	A	52
2019-01-09	(9)	actinidine	900		202	A	42
2019-01-09	(9)	actinidine	900		208	A	67
2019-01-24	(9)	actinidine	900	4	2	A	73
2019-01-24	(9)	actinidine	900		64	A	31
2019-01-24	(9)	actinidine	900		209	A	92
2019-01-24	(9)	actinidine	900		233	A	37
2019-01-24	(9)	actinidine	900	4
2019-01-24	(9)	actinidine	900	4
2019-01-24	(9)	actinidine	900	3
2019-05-01	(9)	actinidine	33	1	1	O	10.5
2019-05-01	(9)	actinidine	33		7	A	30
2019-05-01	(9)	actinidine	33		59	Z	57
2019-05-01	(9)	actinidine	100	4	53	O	7.8
2019-05-01	(9)	actinidine	100		175	A	94
2019-05-05	(9)	actinidine	100	4	38	A	79
2019-05-05	(9)	actinidine	300	4	30	Z	16
2019-05-05	(9)	actinidine	300		31	A	60
2019-05-05	(9)	actinidine	900	4	5	A	40
2019-05-05	(9)	actinidine	900		205	A	37
2019-05-05	(9)	actinidine	2700	4	65	A	158
2019-05-05	(9)	actinidine	2700		199	A	38
2020-07-05	(10)	dihydroactinidiolide	33	1	1	O	24
2020-07-05	(10)	dihydroactinidiolide	33		39	V	9
2020-07-05	(10)	dihydroactinidiolide	100	4	15	O	11
2020-07-05	(10)	dihydroactinidiolide	100		32	Z	5
2020-07-05	(10)	dihydroactinidiolide	100		75	Z	66
2020-07-08	(10)	dihydroactinidiolide	100	4	1	V	6
2020-07-08	(10)	dihydroactinidiolide	100		2	N	40
2020-07-08	(10)	dihydroactinidiolide	100		5	N	35
2020-07-08	(10)	dihydroactinidiolide	100		196	Z	1
2020-07-08	(10)	dihydroactinidiolide	300	4	37	V	22
2020-07-08	(10)	dihydroactinidiolide	900	4	14	V	40
2020-07-08	(10)	dihydroactinidiolide	900		29	V	20
2020-07-08	(10)	dihydroactinidiolide	900		101	V	16
Dec. 2018 - Oct. 2020		negative control		171.5		A	39
Dec. 2018 - Oct. 2020		negative control		171.5		N	0
Dec. 2018 - Oct. 2020		negative control		171.5		O	0
Dec. 2018 - Oct. 2020		negative control		171.5		V	22
Dec. 2018 - Oct. 2020		negative control		171.5		Z	27

## Sheet: habituation-dishabituation
					response time (sec)
date (YYYY-MM-DD)	day #	plant	amount (g)	availability (hours)	cat A	cat N	cat O	cat V	cat Z
2019-07-16	1	A. polygama (dried fruit gall powder)	0.5	2	-	344	287	318	156
2019-07-17	2	A. polygama (dried fruit gall powder)	0.5	2	-	134	395	182	60
2019-07-18	3	A. polygama (dried fruit gall powder)	0.5	2	-	146	87	430	124
2019-07-19	4	A. polygama (dried fruit gall powder)	0.5	2	-	95	120	59	10
2019-07-20	5	A. polygama (dried fruit gall powder)	0.5	2	-	0	48	140	11
2019-07-21	6	A. polygama (dried fruit gall powder)	0.5	2	-	186	75	39	0
2019-07-22	7	A. polygama (dried fruit gall powder)	0.5	2	-	86	171	27	0
2019-07-23	8	A. polygama (dried fruit gall powder)	0.5	2	-	0	173	57	0
2019-07-24	9	A. polygama (dried fruit gall powder)	0.5	2	-	126	0	8	0
2019-07-25	10	A. polygama (dried fruit gall powder)	0.5	2	-	0	0	0	0
2019-07-26	11	A. polygama (dried fruit gall powder)	5	2	-	93	73	86	0
2019-07-27	12	L. tatarica (sawdust)	5	2	-	7	416	150	0
2019-08-26	1	L. tatarica (sawdust)	2.5	2	-	94	472	252	152
2019-08-27	2	L. tatarica (sawdust)	2.5	2	-	45	368	0	10
2019-08-28	3	L. tatarica (sawdust)	2.5	2	-	0	30	0	23
2019-08-29	4	L. tatarica (sawdust)	2.5	2	-	23	305	176	18
2019-08-30	5	L. tatarica (sawdust)	2.5	2	-	17	134	71	0
2019-08-31	6	L. tatarica (sawdust)	2.5	2	-	44	272	101	0
2019-09-01	7	L. tatarica (sawdust)	2.5	2	-	0	33	71	0
2019-09-02	8	L. tatarica (sawdust)	2.5	2	-	0	0	14	0
2019-09-03	9	L. tatarica (sawdust)	2.5	2	-	12	166	1	0
2019-09-04	10	L. tatarica (sawdust)	2.5	2	-	0	0	0	0
2019-09-05	11	N. cataria (dried and cut leaves)	2.5	2	-	39	106	60	0
2019-09-18	1	N. cataria (dried and cut leaves)	2.5	2	-	207	138	9	0
2019-09-19	2	N. cataria (dried and cut leaves)	2.5	2	-	39	102	20	0
2019-09-20	3	N. cataria (dried and cut leaves)	2.5	2	-	45	57	0	0
2019-09-21	4	N. cataria (dried and cut leaves)	2.5	2	-	44	63	0	0
2019-09-22	5	N. cataria (dried and cut leaves)	2.5	2	-	19	0	0	0
2019-09-23	6	N. cataria (dried and cut leaves)	2.5	2	-	7	14	0	0
2019-09-24	7	N. cataria (dried and cut leaves)	2.5	2	-	0	55	46	0
2019-09-25	8	N. cataria (dried and cut leaves)	2.5	2	-	84	58	0	0
2019-09-26	9	N. cataria (dried and cut leaves)	2.5	2	-	2	0	0	0
2019-09-27	10	N. cataria (dried and cut leaves)	2.5	2	-	12	0	0	0
2019-09-28	11	L. tatarica (sawdust)	2.5	2	-	0	282	0	0
2019-12-20	1	A. polygama (dried fruit gall powder)	2.5	12	1913	421	542	455	387
2019-12-21	2	A. polygama (dried fruit gall powder)	2.5	12	631	77	178	41	27
2019-12-22	3	A. polygama (dried fruit gall powder)	2.5	12	402	47	195	0	11
2019-12-23	4	A. polygama (dried fruit gall powder)	2.5	12	229	262	203	31	0
2019-12-24	5	A. polygama (dried fruit gall powder)	2.5	12	357	98	135	0	0
2019-12-25	6	A. polygama (dried fruit gall powder)	2.5	12	349	14	76	59	0
2019-12-26	7	A. polygama (dried fruit gall powder)	2.5	12	28	30	4	28	45
2019-12-27	8	A. polygama (dried fruit gall powder)	2.5	12	267	0	43	0	94
2019-12-28	9	A. polygama (dried fruit gall powder)	2.5	12	314	228	173	65	0
2019-12-29	10	A. polygama (dried fruit gall powder)	2.5	12	160	3	0	54	0
2019-12-30	11	A. polygama (dried fruit gall powder)	2.5	12	209	85	86	90	0
2019-12-30	11	L. tatarica (sawdust)	2.5	12	49	10	333	41	155
2019-12-31	12	A. polygama (dried fruit gall powder)	2.5	12	209	129	0	43	0
2019-12-31	12	N. cataria (dried and cut leaves)	2.5	12	132	99	24	42	20

## Sheet: BORIS plants
cat	plant	tissue (form)	form	date (YYYY-MM-DD)	duration (stopwatch)	duration (BORIS)	standing (sec)	sitting (sec)	lying on side (sec)	lying on back (sec)	standing (%)	sitting (%)	lying on side (%)	lying on back (%)	biting (sec)	head rubbing (sec)	holding (sec)	licking (sec)	raking (sec)	biting (%)	head rubbing (%)	holding (%)	licking (%)	raking (%)	head shaking (#)	rippling of back (#)	rolling on side (#)	twitching of back (#)	head shaking (#/min)	rippling of back (#/min)	rolling on side (#/min)	twitching of back (#/min)
A	N. cataria	leaves	dried, cut	2018-11-29	42	44	8	36	0	0	0.181818	0.818182	0	0	0	42	0	0	0	0	0.954545	0	0	0	2	0	0	0	2.72727	0	0	0
A	N. cataria	leaves	dried, cut	2018-11-19	58	54	15	39	0	0	0.277778	0.722222	0	0	0	51	0	0	0	0	0.944444	0	0	0	3	0	0	0	3.33333	0	0	0
A	N. cataria	leaves	dried, cut	2018-11-01	38	45.3	0	45.3	0	0	0	1	0	0	0	45.3	0	0	0	0	1	0	0	0	1	0	0	0	1.3245	0	0	0
A	N. cataria	leaves	dried, cut	2018-11-05	36	38.7	0	38.7	0	0	0	1	0	0	0	38.7	0	0	0	0	1	0	0	0	3	0	0	0	4.65116	0	0	0
A	N. cataria	leaves	dried, cut	2018-11-02	97	93.8	8	85.8	0	0	0.0852878	0.914712	0	0	0	86.3	0	0	0	0	0.920043	0	0	0	1	0	0	3	0.639659	0	0	1.91898
H	N. cataria	leaves	dried, cut	2018-11-20	57	57	4.7	52	0	0	0.0824561	0.912281	0	0	1.8	56	0	0	0	0.0315789	0.982456	0	0	0	2	0	1	0	2.10526	0	1.05263	0
H	N. cataria	leaves	dried, cut	2018-11-05	63	60	0	60	0	0	0	1	0	0	1.6	59	0	2.6	0	0.0266667	0.983333	0	0.0433333	0	1	0	1	0	1	0	1	0
H	N. cataria	leaves	dried, cut	2018-11-09	32	33.8	4.7	29.1	0	0	0.139053	0.860947	0	0	0.6	30.1	0	0	0	0.0177515	0.890533	0	0	0	1	0	0	0	1.77515	0	0	0
H	N. cataria	leaves	dried, cut	2018-11-22	89	83.9	6.8	25.5	51.6	0	0.0810489	0.303933	0.615018	0	17	54	26.8	0	6	0.202622	0.643623	0.319428	0	0.0715137	1	0	2	0	0.715137	0	1.43027	0
H	N. cataria	leaves	dried, cut	2018-11-02	30	27.6	8.15	19.45	0	0	0.29529	0.70471	0	0	0	27.6	0	0	0	0	1	0	0	0	2	0	0	0	4.34783	0	0	0
N	N. cataria	leaves	dried, cut	2018-11-02	59	52	0	28	24	0	0	0.538462	0.461538	0	0	29	6.3	0	0	0	0.557692	0.121154	0	0	2	3	2	0	2.30769	3.46154	2.30769	0
N	N. cataria	leaves	dried, cut	2018-11-20	62	49	0	44	5	0	0	0.897959	0.102041	0	0	38	3.6	0	0	0	0.77551	0.0734694	0	0	1	5	2	0	1.22449	6.12245	2.44898	0
N	N. cataria	leaves	dried, cut	2018-11-20	52	51.5	0	25	26.5	0	0	0.485437	0.514563	0	0	35.9	8.2	0	0	0	0.697087	0.159223	0	0	1	2	2	0	1.16505	2.3301	2.3301	0
N	N. cataria	leaves	dried, cut	2018-11-29	47	55.6	0	17.8	33.9	3.9	0	0.320144	0.609712	0.0701439	0	37.8	10.6	0	10.7	0	0.679856	0.190647	0	0.192446	2	2	4	3	2.15827	2.15827	4.31655	3.23741
N	N. cataria	leaves	dried, cut	2018-11-22	81	76.1	0	38.9	35.5	1.8	0	0.51117	0.466491	0.0236531	0	59.1	5.4	0	0	0	0.77661	0.0709593	0	0	3	1	3	0	2.36531	0.788436	2.36531	0
O	N. cataria	leaves	dried, cut	2018-11-07	56	43	1.6	8.8	32.4	0.8	0.0372093	0.204651	0.753488	0.0186047	11.3	18.6	12.8	0	2.8	0.262791	0.432558	0.297674	0	0.0651163	0	0	6	0	0	0	8.37209	0
O	N. cataria	leaves	dried, cut	2018-11-19	61	58	0	2.1	55.7	0	0	0.0362069	0.960345	0	5.9	33.7	27	0	16.8	0.101724	0.581034	0.465517	0	0.289655	1	0	2	0	1.03448	0	2.06897	0
O	N. cataria	leaves	dried, cut	2018-11-02	69	64.5	0	0.5	63.9	0	0	0.00775194	0.990698	0	6.5	32.9	39.3	0	31.7	0.100775	0.510078	0.609302	0	0.491473	1	1	1	0	0.930233	0.930233	0.930233	0
O	N. cataria	leaves	dried, cut	2018-11-05	56	50.9	0	9	41.9	0	0	0.176817	0.823183	0	3.9	32.6	24.4	0	19.7	0.0766208	0.640472	0.479371	0	0.387033	0	0	2	0	0	0	2.35756	0
O	N. cataria	leaves	dried, cut	2018-11-05	71	68.3	0	9.5	58.7	0	0	0.139092	0.859444	0	11.6	29.3	44.4	0	31.3	0.169839	0.42899	0.650073	0	0.458272	0	0	2	1	0	0	1.75695	0.878477
V	N. cataria	leaves	dried, cut	2018-11-01	44	45	0	15.3	26	3.6	0	0.34	0.577778	0.08	2.9	19.5	23.2	0	6	0.0644444	0.433333	0.515556	0	0.133333	1	2	1	1	1.33333	2.66667	1.33333	1.33333
V	N. cataria	leaves	dried, cut	2018-11-05	91	83.8	0	21.8	62	0	0	0.260143	0.739857	0	3.6	58.4	44.3	0	9.7	0.0429594	0.696897	0.52864	0	0.115752	2	0	2	2	1.43198	0	1.43198	1.43198
V	N. cataria	leaves	dried, cut	2018-11-19	37	34.5	2.9	31.6	0	0	0.084058	0.915942	0	0	0	34.5	0	0	0	0	1	0	0	0	2	2	0	0	3.47826	3.47826	0	0
V	N. cataria	leaves	dried, cut	2018-11-20	30	30.4	4.4	6.3	19.8	0	0.144737	0.207237	0.651316	0	0.5	19.3	14.6	0	6.8	0.0164474	0.634868	0.480263	0	0.223684	1	0	1	0	1.97368	0	1.97368	0
V	N. cataria	leaves	dried, cut	2018-11-01	94	79.6	0	23	56.6	0	0	0.288945	0.711055	0	3.9	59.8	45.5	0	13.2	0.048995	0.751256	0.571608	0	0.165829	1	0	2	0	0.753769	0	1.50754	0
V	N. cataria	leaves	dried, cut	2018-11-05	12	10.3	0	10.3	0	0	0	1	0	0	0	8.1	0	0	0	0	0.786408	0	0	0	0	0	0	0	0	0	0	0
V	N. cataria	leaves	dried, cut	2018-11-20	13	7.3	1.3	6	0	0	0.178082	0.821918	0	0	0	6	0	0	0	0	0.821918	0	0	0	1	0	0	0	8.21918	0	0	0
V	N. cataria	leaves	dried, cut	2018-11-02	29	23.2	0	23.2	0	0	0	1	0	0	0	19.3	0	0	0	0	0.831897	0	0	0	2	0	0	0	5.17241	0	0	0
V	N. cataria	leaves	dried, cut	2018-11-26	35	26.7	5.4	21.3	0	0	0.202247	0.797753	0	0	0	20.2	0	0	0	0	0.756554	0	0	0	1	0	0	1	2.24719	0	0	2.24719
Z	N. cataria	leaves	dried, cut	2018-11-05	55	53.5	0	46.6	6.9	0	0	0.871028	0.128972	0	0	36.6	0	0	0	0	0.684112	0	0	0	4	11	1	1	4.48598	12.3364	1.1215	1.1215
Z	N. cataria	leaves	dried, cut	2018-11-26	63	62.5	0	62.5	0	0	0	1	0	0	0	42.2	0	0	0	0	0.6752	0	0	0	2	17	0	0	1.92	16.32	0	0
Z	N. cataria	leaves	dried, cut	2018-11-01	28	27.4	0	27.4	0	0	0	1	0	0	0	19.3	0	0	0	0	0.70438	0	0	0	2	5	0	1	4.37956	10.9489	0	2.18978
Z	N. cataria	leaves	dried, cut	2018-11-05	54	49.7	0	45	4.7	0	0	0.905433	0.0945674	0	0	34.2	0	0	0	0	0.688129	0	0	0	5	9	1	1	6.03622	10.8652	1.20724	1.20724
Z	N. cataria	leaves	dried, cut	2018-11-20	21	21	0	21	0	0	0	1	0	0	0	15.3	0	0	0	0	0.728571	0	0	0	2	8	0	0	5.71429	22.8571	0	0
Z	N. cataria	leaves	dried, cut	2018-11-19	15	12.2	0	11.1	1.1	0	0	0.909836	0.0901639	0	0	7.3	0	0	0	0	0.598361	0	0	0	1	4	0	3	4.91803	19.6721	0	14.7541
Z	N. cataria	leaves	dried, cut	2018-11-20	7	6	0	6	0	0	0	1	0	0	0	3.4	0	0	0	0	0.566667	0	0	0	1	1	0	1	10	10	0	10
A	A. indica	root	lyophilized, cut	2018-08-24	48	31.5	11	20.5	0	0	0.349206	0.650794	0	0	0	31.5	0	0	0	0	1	0	0	0	0	0	0	0	0	0	0	0
A	A. indica	root	lyophilized, cut	2018-08-31	77	66.5	0.8	65.7	0	0	0.0120301	0.98797	0	0	0	65.8	0	0	0	0	0.989474	0	0	0	1	0	0	1	0.902256	0	0	0.902256
A	A. indica	root	lyophilized, cut	2018-08-30	83	84.6	2	82.5	0	0	0.0236407	0.975177	0	0	0	82.9	0	0	0	0	0.979905	0	0	0	0	0	0	1	0	0	0	0.70922
A	A. indica	root	lyophilized, cut	2018-09-10	104	97.5	12.8	73.9	0	0	0.131282	0.757949	0	0	0	93.3	0	0	0	0	0.956923	0	0	0	1	0	0	0	0.615385	0	0	0
A	A. indica	root	lyophilized, cut	2018-09-14	114	107.1	10.2	96.9	0	0	0.0952381	0.904762	0	0	0	107.1	0	0	0	0	1	0	0	0	1	0	0	0	0.560224	0	0	0
A	A. polygama	fruit gall	dried, powder	2018-07-19	73	64.8	20.4	43	0	0	0.322	0.678	0	0	0	64.8	0	0	0	0	1	0	0	0	2	0	0	0	1.85185	0	0	0
A	A. polygama	fruit gall	dried, powder	2018-07-20	57	45.3	0.8	44.5	0	0	0.018	0.982	0	0	0	31	0	6.6	0	0	0.824	0	0.176	0	1	0	0	1	1.3245	0	0	1.3245
A	A. polygama	fruit gall	dried, powder	2018-08-10	80	67.3	10	56.1	0	0	0.151	0.849	0	0	0	58.2	0	9.1	0	0	0.865	0	0.135	0	4	0	0	1	3.56612	0	0	0.89153
A	A. polygama	fruit gall	dried, powder	2018-08-14	83	57.7	0	57.7	0	0	0	1	0	0	0	48.1	0	9.6	0	0	0.834	0	0.166	0	1	0	0	1	1.03986	0	0	1.03986
A	A. polygama	fruit gall	dried, powder	2018-08-16	57	51.5	3.2	48.3	0	0	0.062	0.938	0	0	0	47.6	0	0	0	0	1	0	0	0	5	0	0	0	5.82524	0	0	0
A	L. tatarica	wood	sawdust	2018-06-15	59	46.3	5	41.3	0	0	0.107991	0.892009	0	0	0	46.3	0	0	0	0	1	0	0	0	4	0	0	0	5.18359	0	0	0
A	L. tatarica	wood	sawdust	2018-06-20	87	68.7	0.8	67.9	0	0	0.0116448	0.988355	0	0	0	68.4	0	0	0	0	0.995633	0	0	0	2	0	1	1	1.74672	0	0.873362	0.873362
A	L. tatarica	wood	sawdust	2018-06-22	76	51.6	3.2	48.4	0	0	0.0620155	0.937984	0	0	0	50.8	0	0	0	0	0.984496	0	0	0	1	0	0	0	1.16279	0	0	0
A	L. tatarica	wood	sawdust	2018-07-09	58	48.1	6.1	42	0	0	0.126819	0.873181	0	0	0	46.9	0	0	0	0	0.975052	0	0	0	2	0	0	0	2.4948	0	0	0
A	L. tatarica	wood	sawdust	2018-07-13	68	49.1	5.6	43.6	0	0	0.114053	0.887984	0	0	0	48	0	0	0	0	0.977597	0	0	0	1	0	0	0	1.222	0	0	0
A	V. officinalis	root	dried, cut	2019-03-28	43	45.5	1.8	43.7	0	0	0.04	0.96	0	0	0	39	0	0	0	0	0.857	0	0	0	1	0	0	0	1.3	0	0	0
A	V. officinalis	root	dried, cut	2019-04-16	51	48.7	3.1	45.7	0	0	0.064	0.936	0	0	0	28.8	0	15.9	0	0	0.591	0	0.326	0	0	0	0	0	0	0	0	0
A	V. officinalis	root	dried, cut	2019-04-16	64	63.8	0	63.8	0	0	0	1	0	0	0	12.8	0	41.4	0	0	0.201	0	0.649	0	0	0	0	0	0	0	0	0
A	V. officinalis	root	dried, cut	2019-04-25	72	69.1	4.9	64.2	0	0	0.071	0.929	0	0	0	66.7	0	0	0	0	0.965	0	0	0	1	0	0	2	0.9	0	0	1.7
A	V. officinalis	root	dried, cut	2019-03-29	99	101.7	0	101.7	0	0	0	1	0	0	0	95.7	0	0.5	0	0	0.941	0	0.005	0	2	0	0	1	1.2	0	0	0.6
O	A. indica	root	lyophilized, cut	2018-09-18	68	65.4	1.4	3	59.5	1.6	0.0214067	0.0458716	0.909786	0.0244648	14.3	23.6	37	0	17.5	0.218654	0.360856	0.565749	0	0.267584	1	0	3	0	0.917431	0	2.75229	0
O	A. indica	root	lyophilized, cut	2018-09-20	64	61.1	0	4.5	56.5	0	0	0.0736498	0.924714	0	4.2	33.8	21.1	0	12	0.0687398	0.553191	0.345336	0	0.196399	1	1	1	0	0.981997	0.981997	0.981997	0
O	A. indica	root	lyophilized, cut	2018-08-24	67	61.3	0	0	53.8	7.5	0	0	0.877651	0.122349	0.5	28.5	27.5	0	14.4	0.00815661	0.464927	0.448613	0	0.23491	1	0	5	0	0.978793	0	4.89396	0
O	A. indica	root	lyophilized, cut	2018-08-31	78	67.6	10.7	3.9	52.3	0.8	0.158284	0.0576923	0.773669	0.0118343	15.9	31.1	26.2	0	8.7	0.235207	0.460059	0.387574	0	0.128698	0	0	2	0	0	0	1.77515	0
O	A. indica	root	lyophilized, cut	2018-08-28	77	64.9	0	0	60	4.9	0	0	0.924499	0.0755008	11.8	20.3	30.1	0	29.7	0.181818	0.312789	0.46379	0	0.457627	0	0	4	0	0	0	3.698	0
O	A. polygama	gall	dried, powder	2018-08-16	65	53.9	0	13.8	39.4	0.8	0	0.255556	0.72963	0.0148148	10.2	29.8	21	0	4.2	0.189239	0.552876	0.38961	0	0.0779221	1	0	3	1	1.11317	0	3.33952	1.11317
O	A. polygama	gall	dried, powder	2018-07-26	67	57.4	0	6.3	51.1	0	0	0.109756	0.890244	0	0	35.5	20.7	0	10.9	0	0.618467	0.360627	0	0.189895	1	1	1	5	1.0453	1.0453	1.0453	5.22648
O	A. polygama	gall	dried, powder	2018-08-07	75	54.3	0	11.6	41.1	1.6	0	0.213628	0.756906	0.0294659	18.8	21	17	0	8.7	0.346225	0.38674	0.313076	0	0.160221	0	0	5	3	0	0	5.52486	3.31492
O	A. polygama	gall	dried, powder	2018-07-23	75	62.8	0	2.3	59.3	1.2	0	0.0366242	0.944268	0.0191083	10.5	35.9	26.7	0	7.1	0.167197	0.571656	0.425159	0	0.113057	0	0	4	0	0	0	3.82166	0
O	A. polygama	gall	dried, powder	2018-08-06	84	71.6	0	4.9	66.7	0	0	0.0684358	0.931564	0	4.2	53.1	19.5	0	5.8	0.0586592	0.74162	0.272346	0	0.0810056	1	2	2	2	0.837989	1.67598	1.67598	1.67598
O	L. tatarica	wood	sawdust	2018-06-12	94	75.8	0	3.9	71.9	0	0	0.0514512	0.948549	0	11.9	24.9	39.1	0	23.8	0.156992	0.328496	0.515831	0	0.313984	0	0	3	1	0	0	2.37467	0.791557
O	L. tatarica	wood	sawdust	2018-06-15	57	44.6	0	9.6	33.4	1.6	0	0.215247	0.748879	0.0358744	7.3	11.5	10.5	0	3.9	0.163677	0.257848	0.235426	0	0.0874439	2	3	5	7	2.69058	4.03587	6.72646	9.41704
O	L. tatarica	wood	sawdust	2018-07-05	95	92	5.7	15.9	70.3	0	0.0619565	0.172826	0.76413	0	14.8	29.9	41.4	0	15.7	0.16087	0.325	0.45	0	0.170652	0	0	5	0	0	0	3.26087	0
O	L. tatarica	wood	sawdust	2018-07-09	90	76.5	0	6.4	69.3	0.8	0	0.0836601	0.905882	0.0104575	0.8	35.5	31.7	0	6.5	0.0104575	0.464052	0.414379	0	0.0849673	1	0	3	1	0.784314	0	2.35294	0.784314
O	L. tatarica	wood	sawdust	2018-07-12	104	84.1	2.6	15.7	63.5	2.4	0.0309156	0.186683	0.755054	0.0285375	13.7	34.5	17	0	2.9	0.162901	0.410226	0.20214	0	0.0344828	0	1	6	2	0	0.713436	4.28062	1.42687
O	V. officinalis	root	dried, cut	2019-04-03	59	56	0	6.3	46.7	3	0	0.1125	0.833929	0.0535714	5.1	27.4	10.4	0	1.8	0.0910714	0.489286	0.185714	0	0.0321429	1	0	3	0	1.07143	0	3.21429	0
O	V. officinalis	root	dried, cut	2019-04-05	74	70.3	0	5.8	64.4	0	0	0.0825036	0.916074	0	6	32.8	14.3	0	8.2	0.0853485	0.466572	0.203414	0	0.116643	4	0	3	5	3.41394	0	2.56046	4.26743
O	V. officinalis	root	dried, cut	2019-04-18	73	60.5	2.9	7.5	50.1	0	0.0479339	0.123967	0.828099	0	10.6	36.2	2.3	0	3.6	0.175207	0.598347	0.0380165	0	0.0595041	1	0	2	2	0.991736	0	1.98347	1.98347
O	V. officinalis	root	dried, cut	2019-04-16	71	68.1	0	3.4	62.9	1.8	0	0.0499266	0.923642	0.0264317	6.3	43.7	3.1	0	3.1	0.092511	0.641703	0.0455213	0	0.0455213	1	0	4	0	0.881057	0	3.52423	0
O	V. officinalis	root	dried, cut	2019-03-29	68	64.9	4.6	20.8	39.5	0	0.0708783	0.320493	0.608629	0	31.6	16.3	24.4	0.8	11.9	0.486903	0.251156	0.375963	0.0123267	0.183359	0	0	3	0	0	0	2.7735	0
Z	A. indica	root	lyophilized, cut	2018-09-14	26	26	0	23.6	2.3	0	0	0.911197	0.0888031	0	0	22.3	0	0	0	0	0.857692	0	0	0	1	8	1	3	2.30769	18.4615	2.30769	6.92308
Z	A. indica	root	lyophilized, cut	2018-08-23	36	30.2	0	27.7	2.5	0	0	0.917219	0.0827815	0	0	17.4	0	0	0	0	0.576159	0	0	0	1	3	1	0	1.98675	5.96026	1.98675	0
Z	A. polygama	fruit gall	dried, powder	2018-08-10	19	10.4	0	10.4	0	0	0	1	0	0	0	4.5	0	0	0	0	0.432692	0	0	0	1	2	0	2	5.76923	11.5385	0	11.5385
Z	A. polygama	fruit gall	dried, powder	2018-07-26	27	26.1	0	26.1	0	0	0	1	0	0	0	18	0	0	0	0	0.689655	0	0	0	0	4	0	4	0	9.1954	0	9.1954
Z	A. polygama	fruit gall	dried, powder	2018-08-10	35	29.1	0	29.1	0	0	0	1	0	0	0	19.3	0	0	0	0	0.66323	0	0	0	0	6	0	2	0	12.3711	0	4.12371
Z	A. polygama	fruit gall	dried, powder	2018-07-24	49	41	0	37.3	3.6	0	0	0.91198	0.0880196	0	0	38.9	0	0	0	0	0.94878	0	0	0	3	4	1	1	4.39024	5.85366	1.46341	1.46341
Z	A. polygama	fruit gall	dried, powder	2018-07-24	98	78.5	0	77.7	0.8	0	0	0.989809	0.0101911	0	0	70.3	0	0	0	0	0.895541	0	0	0	4	16	1	3	3.05732	12.2293	0.764331	2.29299
Z	L. tatarica	wood	sawdust	2018-06-12	27	7.6	0	7.6	0	0	0	1	0	0	0	2.9	0	0	0	0	0.381579	0	0	0	1	3	0	2	7.89474	23.6842	0	15.7895
Z	L. tatarica	wood	sawdust	2018-07-05	38	11.5	0	11.5	0	0	0	1	0	0	0	7.5	0	0	0	0	0.652174	0	0	0	1	2	0	1	5.21739	10.4348	0	5.21739
Z	L. tatarica	wood	sawdust	2018-07-12	34	26.1	0	26.1	0	0	0	1	0	0	0	19.1	0	0	0	0	0.731801	0	0	0	1	6	0	1	2.29885	13.7931	0	2.29885
Z	L. tatarica	wood	sawdust	2018-07-12	117	84.3	0	82.2	2.1	0	0	0.975089	0.024911	0	0	70.8	0	0	0	0	0.839858	0	0	0	3	12	1	2	2.13523	8.54093	0.711744	1.42349
Z	L. tatarica	wood	sawdust	2018-07-13	28	20.6	0	20.6	0	0	0	1	0	0	0	14	0	0	0	0	0.679612	0	0	0	2	4	0	0	5.82524	11.6505	0	0
Z	A. polygama	stem	dried, intact	2020-11-04	-	26	0	7.4	18.6	0	0	0.284615	0.715385	0	0	23	14	0	1.6	0	0.884615	0.538462	0	0.0615385	1	0	1	0	2.30769	0	2.30769	0
Z	A. polygama	stem	dried, intact	2020-11-04	-	8.4	0	8.4	0	0	0	1	0	0	0	7.1	0	0	0	0	0.845238	0	0	0	0	1	0	0	0	7.14286	0	0
Z	A. polygama	stem	dried, intact	2020-11-04	-	17.8	0	17.8	0	0	0	1	0	0	0	14.6	0	0	0	0	0.820225	0	0	0	0	3	0	0	0	10.1124	0	0
Z	A. polygama	stem	dried, intact	2020-11-08	-	21.7	0	21.7	0	0	0	1	0	0	0	21.7	0	0	0	0	1	0	0	0	1	1	0	0	2.76498	2.76498	0	0

## Sheet: BORIS single compounds
cat	compound	quantity (µg)	date (YYYY-MM-DD)	duration (stopwatch)	duration (BORIS)	standing (sec)	sitting (sec)	lying on side (sec)	lying on back (sec)	standing (%)	sitting (%)	lying on side (%)	lying on back (%)	biting (sec)	head rubbing (sec)	holding (sec)	licking (sec)	raking (sec)	biting (%)	head rubbing (%)	holding (%)	licking (%)	raking (%)	head shaking (#)	rippling of back (#)	rolling on side (#)	twitching of back (#)	head shaking (#/min)	rippling of back (#/min)	rolling on side (#/min)	twitching of back (#/min)
A	actinidine	33	2019-05-01	30	27.6	16.1	11.5	0	0	0.583333	0.416667	0	0	0	26.1	0	0	0	0	0.945652	0	0	0	1	0	0	2	2.17391	0	0	4.34783
A	actinidine	900	2019-01-24	31	31.5	5.2	26.3	0	0	0.165079	0.834921	0	0	0	7	0	17.4	0	0	0.222222	0	0.552381	0	0	0	0	2	0	0	0	3.80952
A	actinidine	900	2019-05-05	37	33.5	10.5	23	0	0	0.313433	0.686567	0	0	0	20.5	0	7.8	0	0	0.61194	0	0.232836	0	1	0	0	0	1.79104	0	0	0
A	actinidine	100	2019-01-01	32	34.4	21	13.4	0	0	0.610465	0.389535	0	0	0	15.8	0	16.5	0	0	0.459302	0	0.479651	0	1	0	0	0	0	0	0	0
A	actinidine	900	2019-01-24	37	35.6	0	35.6	0	0	0	1	0	0	0	33.7	0	0	0	0	0.946629	0	0	0	0	0	0	2	0	0	0	3.37079
A	actinidine	100	2019-01-01	42	39.1	16.9	20.2	2	0	0.432225	0.516624	0.0511509	0	0.5	7.1	1.7	17.2	0.4	0.0127877	0.181586	0.0434783	0.439898	0.0102302	1	0	1	0	1.53453	0	1.53453	0
A	actinidine	2700	2019-05-05	38	39.9	5.5	34.4	0	0	0.137845	0.862155	0	0	0	1.9	0	36.2	0	0	0.047619	0	0.907268	0	0	0	0	0	0	0	0	0
A	actinidine	900	2019-01-09	42	41.1	27.2	13.9	0	0	0.6618	0.3382	0	0	0	30.4	0	9.9	0	0	0.739659	0	0.240876	0	0	0	0	0	0	0	0	0
A	actinidine	300	2019-01-09	40	41.2	0	41.2	0	0	0	1	0	0	2.1	8	0	21.7	0	0.0509709	0.194175	0	0.526699	0	0	0	0	0	0	0	0	0
A	actinidine	900	2019-05-05	40	41.8	9.5	32.3	0	0	0.227273	0.772727	0	0	0	27.3	0	11.5	0	0	0.65311	0	0.27512	0	2	0	0	2	2.87081	0	0	2.87081
A	actinidine	900	2019-01-09	52	51.7	1.3	50.4	0	0	0.0251451	0.974855	0	0	0	6.1	0	43.5	0	0	0.117988	0	0.841393	0	0	0	0	0	0	0	0	0
A	actinidine	300	2019-05-05	60	65.5	17.2	48.3	0	0	0.262595	0.737405	0	0	0	29.1	0	34.4	0	0	0.444275	0	0.525191	0	2	0	0	0	1.83206	0	0	0
A	actinidine	900	2019-01-09	67	68.6	4.5	64.1	0	0	0.0655977	0.934402	0	0	0	63.3	0	0	0	0	0.922741	0	0	0	0	0	0	4	0	0	0	3.49854
A	actinidine	900	2019-01-24	73	69.9	3.1	66.8	0	0	0.0443491	0.955651	0	0	0	61.1	0.8	0	0	0	0.874106	0.0114449	0	0	2	0	0	0	1.71674	0	0	0
A	actinidine	33	2019-01-01	73	74.1	13.5	60.6	0	0	0.182186	0.817814	0	0	0	57.3	0	11.1	0	0	0.773279	0	0.149798	0	1	0	0	1	0.809717	0	0	0.809717
A	actinidine	100	2019-05-05	79	77.9	12	65.9	0	0	0.154044	0.845956	0	0	0	44	0	32.9	0	0	0.564827	0	0.422336	0	1	0	0	0	0.770218	0	0	0
A	actinidine	900	2019-01-24	92	82.7	5.7	43.5	33.5	0	0.0689238	0.525998	0.405079	0	3.6	58.3	28	0	7.8	0.0435308	0.704958	0.338573	0	0.0943168	2	0	2	0	1.45103	0	1.45103	0
A	actinidine	100	2019-05-01	94	88.4	2.6	69.2	16.6	0	0.0294118	0.782805	0.187783	0	0	70.5	0	4.2	0	0	0.797511	0	0.0475113	0	2	0	1	0	1.35747	0	0.678733	0
A	actinidine	100	2019-01-01	98	101.3	4	22.5	74.8	0	0.0394867	0.222113	0.738401	0	3.3	85	55.3	0	8.4	0.0325765	0.839092	0.545903	0	0.082922	2	0	2	1	0	0	1.1846	0.5923
A	actinidine	2700	2019-05-05	158	160.9	54.6	106.3	0	0	0.339341	0.660659	0	0	0	34.5	0	122.5	0	0	0.214419	0	0.761342	0	2	0	0	1	0.745805	0	0	0.372902
A	actinidine	100	2019-01-01	158	165.8	10.1	145.9	9.8	0	0.0609168	0.879976	0.0591074	0	2.9	82.1	8.1	62.4	1.5	0.017491	0.495175	0.048854	0.376357	0.00904704	3	0	1	0	1.08565	0	0.361882	0
A	actinidine	100	2019-01-01	173	173.1	10.2	162.9	0	0	0.0589255	0.941075	0	0	0	83.2	0	84.4	0	0	0.480647	0	0.487579	0	1	0	0	1	0.34662	0	0	0.34662
A	actinidine	100	2019-01-09	186	182.1	5.7	173.2	3.2	0	0.0313015	0.951126	0.0175728	0	0	95.9	2.4	74.1	1.3	0	0.526634	0.0131796	0.406919	0.00713893	2	0	0	0	0.658979	0	0	0
A	actinidine	33	2019-01-01	236	234	17.6	166.5	49.9	0	0.0752137	0.711538	0.213248	0	1.7	184.8	33.1	8.6	3.9	0.00726496	0.789744	0.141453	0.0367521	0.0166667	4	0	3	0	1.02564	0	0.769231	0
A	isoiridomyrmecin	100	2019-01-01	33	30.6	14.3	16.3	0	0	0.46732	0.53268	0	0	0	29.8	0	0	0	0	0.973856	0	0	0	0	0	0	0	0	0	0	0
A	cis-trans-nepetalactone	300	2019-01-05	34	30.8	9.7	21.1	0	0	0.314935	0.685065	0	0	0	30.8	0	0	0	0	1	0	0	0	0	0	0	0	0	0	0	0
A	dihydronepetalactone	900	2019-01-13	37	39	1.6	37.4	0	0	0.0410256	0.958974	0	0	0	37.1	0	0	0	0	0.951282	0	0	0	0	0	0	0	0	0	0	0
A	iridomyrmecin	900	2019-01-05	46	41.4	7.8	27.4	6.2	0	0.188406	0.661836	0.149758	0	3.1	34.6	4.5	0	1.6	0.0748792	0.835749	0.108696	0	0.0386473	0	0	1	0	0	0	1.44928	0
A	cis-trans-nepetalactone	100	2019-01-05	61	57.2	0	57.2	0	0	0	1	0	0	0	57.2	0	0	0	0	1	0	0	0	1	0	0	6	1.04895	0	0	6.29371
A	dihydronepetalactone	100	2019-01-13	53	62.1	6	56.1	0	0	0.0966184	0.903382	0	0	0	60.5	0	0	0	0	0.974235	0	0	0	1	0	0	1	0.966184	0	0	0.966184
A	iridomyrmecin	900	2019-01-05	70	68.7	10.3	58.4	0	0	0.149927	0.850073	0	0	0	60	0	0	0	0	0.873362	0	0	0	1	0	0	0	0.873362	0	0	0
A	dihydronepetalactone	100	2019-01-13	67	70	0.3	17.9	51.8	0	0.00428571	0.255714	0.74	0	0	62.4	49.4	0	1.3	0	0.891429	0.705714	0	0.0185714	0	0	2	1	0	0	1.71429	0.857143
A	isoiridomyrmecin	100	2019-01-13	72	72.1	6	53.5	12.6	0	0.0832178	0.742025	0.174757	0	3.2	53.8	12.3	0	6.3	0.0443828	0.746186	0.170596	0	0.0873786	1	0	3	1	0.832178	0	2.49653	0.832178
A	cis-trans-nepetalactone	900	2019-01-05	98	91.3	3.8	53.3	34.2	0	0.041621	0.58379	0.374589	0	2.4	58.1	6.8	0	3.9	0.026287	0.636364	0.0744797	0	0.0427163	5	0	1	0	3.28587	0	0.657174	0
A	trans-cis-nepetalactone	900	2019-06-19	238	258.7	17.1	241.6	0	0	0.0660997	0.9339	0	0	0	201	0	28.7	0	0	0.776962	0	0.110939	0	2	0	0	1	0.463858	0	0	0.231929
N	cis-trans-nepetalactone	100	2018-12-28	38	43.2	0	25.2	17.9	0	0	0.583333	0.414352	0	4.15	29.9	9.3	0	4.4	0.0960648	0.69213	0.215278	0	0.101852	0	0	1	2	0	0	1.38889	2.77778
N	dihydroactinidiolide	100	2020-07-08	35	31.6	7	24.6	0	0	0.221519	0.778481	0	0	5	23.9	0	0	0	0.158228	0.756329	0	0	0	0	1	0	0	0	1.89873	0	0
N	dihydroactinidiolide	100	2020-07-08	40	39.9	0	39.9	0	0	0	1	0	0	1.9	32.9	0	0	0	0.047619	0.824561	0	0	0	0	1	0	0	0	1.50376	0	0
O	iridomyrmecin	100	2018-12-24	40	35	0	5.4	28.8	0.8	0	0.154286	0.822857	0.0228571	9.1	4.9	4.9	1.3	2.6	0.26	0.14	0.14	0.0371429	0.0742857	0	0	3	0	0	0	5.14286	0
O	isoiridomyrmecin	900	2019-01-13	49	31.4	0	3.9	27.5	0	0	0.124204	0.875796	0	2.8	19.1	4.6	0	0	0.089172	0.60828	0.146497	0	0	0	0	0	0	0	0	0	0
O	isoiridomyrmecin	33	2019-01-01	33	34	0	2.6	31.7	0	0	0.08	0.93	0	0	18.6	0	0	0	0	0.54	0	0	0	2	0	2	2	3.5	0	3.5	3.5
O	isoiridomyrmecin	100	2019-01-13	43	39.2	0	3.3	35.9	0	0	0.0841837	0.915816	0	14.6	10.5	9	0	7.3	0.372449	0.267857	0.229592	0	0.186224	0	0	1	0	0	0	1.53061	0
O	isoiridomyrmecin	100	2019-01-01	41	41.5	0	1	40.5	0	0	0.0240964	0.975904	0	6.7	9.7	2.5	0	9.6	0.161446	0.233735	0.060241	0	0.231325	1	0	1	0	1.44578	0	1.44578	0
O	cis-trans-nepetalactone	100	2018-12-28	36	34	0	7.9	26.1	0	0	0.23	0.77	0	3.6	17.3	5.9	0	1.5	0.11	0.51	0.17	0	0.04	1	0	1	0	1.8	0	1.8	0
O	cis-trans-nepetalactone	100	2019-01-05	74	72.5	1.6	6	64.9	0	0.022069	0.0827586	0.895172	0	11.8	27.1	12.2	0	3.1	0.162759	0.373793	0.168276	0	0.0427586	1	0	3	1	0.827586	0	2.48276	0.827586
O	dihydronepetalactone	900	2019-01-13	34	35.1	0	12.3	22.8	0	0	0.350427	0.649573	0	0	20.1	0	0	0	0	0.57265	0	0	0	1	0	1	1	1.7094	0	1.7094	1.7094
O	dihydronepetalactone	300	2019-01-13	47	43.7	0	5	38.7	0	0	0.114416	0.885584	0	3.1	20.3	3.1	0	1.1	0.0709382	0.464531	0.0709382	0	0.0251716	1	0	2	0	1.373	0	2.746	0
O	dihydronepetalactone	100	2018-12-28	53	47.9	0	11.2	36.7	0	0	0.23382	0.76618	0	26.2	6.3	10.8	0.3	1.1	0.546973	0.131524	0.22547	0.00626305	0.0229645	0	0	3	0	0	0	3.75783	0
O	dihydronepetalactone	900	2019-01-13	62	59.6	0	6.4	53.2	0	0	0.107383	0.892617	0	5.9	36.5	2.1	0	0	0.0989933	0.612416	0.0352349	0	0	0	0	3	0	0	0	3.02013	0
O	isodihydronepetalactone	33	2018-12-24	60	47.3	0	9.4	37.9	0	0	0.198732	0.801268	0	1.9	16	18.7	0	2.6	0.0401691	0.338266	0.395349	0	0.0549683	1	0	2	0	1.2685	0	2.537	0
O	isodihydronepetalactone	900	2019-01-09	49	47.3	0	2.3	45	0	0	0.0486258	0.951374	0	0	21.7	3.1	0	3.4	0	0.458774	0.0655391	0	0.0718816	2	0	3	0	2.537	0	3.8055	0
O	isodihydronepetalactone	100	2018-12-24	84	82.2	0	11	71.2	0	0	0.13382	0.86618	0	13	36.8	17.8	0	3.7	0.158151	0.447689	0.216545	0	0.0450122	0	0	3	0	0	0	2.18978	0
O	isoneonepetalactone	100	2019-10-09	37	33.8	0	0.8	33	0	0	0.0236686	0.976331	0	3.2	16.5	12.5	0	4.6	0.0946746	0.488166	0.369822	0	0.136095	0	0	1	0	0	0	1.77515	0
O	isoneonepetalactone	300	2019-10-13	42	39.9	0	0	38.1	1.8	0	0	0.954887	0.0451128	8.1	18.1	8.9	0	0.5	0.203008	0.453634	0.223058	0	0.0125313	1	0	1	0	1.50376	0	1.50376	0
O	isoneonepetalactone	900	2019-10-13	47	46.4	0	0	46.4	0	0	0	1	0	12.7	11.7	25.7	2.9	8.3	0.273707	0.252155	0.553879	0.0625	0.178879	0	0	1	0	0	0	1.2931	0
O	neonepetalactone	900	2019-10-13	39	36.5	0	0.3	35.3	0.9	0	0.00821918	0.967123	0.0246575	1.3	10.8	8.4	0	2.9	0.0356164	0.29589	0.230137	0	0.0794521	0	0	2	0	0	0	3.28767	0
O	trans-cis-nepetalactone	300	2019-06-19	35	35.6	0	2.4	33.2	0	0	0.0674157	0.932584	0	1.6	24.6	11.5	0	0	0.0449438	0.691011	0.323034	0	0	1	0	1	0	1.68539	0	1.68539	0
O	trans-cis-nepetalactone	100	2019-06-15	51	42.4	0	0	42.4	0	0	0	1	0	3.9	15.8	10	0	8.4	0.0919811	0.372642	0.235849	0	0.198113	1	0	2	0	1.41509	0	2.83019	0
O	trans-cis-nepetalactone	100	2019-06-15	49	46.9	0	8.7	38.2	0	0	0.185501	0.814499	0	0	32.6	1.1	0	2.5	0	0.695096	0.0234542	0	0.0533049	0	0	4	0	0	0	5.11727	0
O	trans-cis-nepetalactone	300	2019-06-19	49	50.7	0	0	50.7	0	0	0	1	0	5.8	25.6	12.3	0	8.6	0.114398	0.504931	0.242604	0	0.169625	0	0	1	0	0	0	1.18343	0
O	trans-cis-nepetalactone	100	2019-05-05	71	65.7	0	5.5	60.2	0	0	0.0837139	0.916286	0	7.8	39.5	28.2	3.3	11	0.118721	0.601218	0.429224	0.0502283	0.167428	0	0	3	0	0	0	2.73973	0
O	trans-cis-nepetalactone	300	2019-05-05	81	74.3	0	8.9	60.1	5.3	0	0.119785	0.808883	0.0713324	1.1	50.7	14.3	0	5.7	0.0148048	0.682369	0.192463	0	0.076716	2	0	6	2	1.61507	0	4.84522	1.61507
O	trans-cis-nepetalactone	100	2019-06-15	90	92.7	0	0	92.7	0	0	0	1	0	10.7	56.2	35.6	0	17.3	0.115426	0.606257	0.384035	0	0.186624	1	0	1	0	0.647249	0	0.647249	0
O	actinidine	33	2019-05-01	10.5	12	0	1.6	10.6	0	0	0.13	0.87	0	5.4	0	6.6	0	0.5	0.44	0	0.54	0	0.04	0	0	0	0	0	0	0	0
O	actinidine	100	2019-05-01	7.8	10	0	0	9.6	0	0	0	1	0	5.3	0	0.5	0	2.6	0.55	0	0.05	0	0.27	0	0	0	0	0	0	0	0
O	dihydroactinidiolide	100	2020-07-05	11	11	0	0	11.4	0	0	0	1	0	6.8	0	7	0	5.2	0.6	0	0.61	0	0.46	0	0	0	0	0	0	0	0
O	dihydroactinidiolide	33	2020-07-05	24	19	0	0	18.9	0	0	0	1	0	3	7.1	9.7	0	0	0.16	0.38	0.51	0	0	1	0	1	0	3.2	0	3.2	0
V	cis-trans-nepetalactone	33	2018-12-28	22	11.5	2.3	9.15	0	0	0.2	0.795652	0	0	2.5	10.4	0	0	0	0.217391	0.904348	0	0	0	0	0	0	0	0	0	0	0
V	cis-trans-nepetalactone	100	2019-01-05	10	12	0	12	0	0	0	1	0	0	0	12	0	0	0	0	1	0	0	0	2	0	0	1	10	0	0	5
V	cis-trans-nepetalactone	33	2018-12-28	16	12.3	5.35	3.75	3.2	0	0.434959	0.304878	0.260163	0	0.55	11.2	0	0	0	0.0447154	0.910569	0	0	0	0	0	1	0	0	0	4.87805	0
V	cis-trans-nepetalactone	900	2019-01-05	33	34.9	20.3	14.6	0	0	0.581662	0.418338	0	0	0	23.7	7.4	0	0	0	0.679083	0.212034	0	0	1	1	0	1	1.7192	1.7192	0	1.7192
V	dihydroactinidiolide	33	2020-07-05	9	8.55	8.55	0	0	0	1	0	0	0	1.15	5.75	0	0	0	0.134503	0.672515	0	0	0	1	0	0	0	7.01754	0	0	0
V	dihydroactinidiolide	900	2020-07-08	16	17.5	0	17.5	0	0	0	1	0	0	1.2	16.4	0	0	0	0.0685714	0.937143	0	0	0	0	0	0	0	0	0	0	0
V	dihydroactinidiolide	900	2020-07-08	20	19.3	4.2	7.1	8	0	0.217617	0.367876	0.414508	0	1.2	16.3	6.8	0	4.4	0.0621762	0.84456	0.352332	0	0.227979	1	0	1	0	3.10881	0	3.10881	0
V	dihydroactinidiolide	300	2020-07-08	22	22.1	0	22.1	0	0	0	1	0	0	0	21.9	16.2	0	0	0	0.99095	0.733032	0	0	0	0	0	0	0	0	0	0
V	dihydroactinidiolide	900	2020-07-08	40	39.8	0	17.1	22.7	0	0	0.429648	0.570352	0	1.75	29.9	22.8	0	5.55	0.0439698	0.751256	0.572864	0	0.139447	1	0	1	0	1.50754	0	1.50754	0
Z	cis-trans-nepetalactone	100	2019-01-05	17	15.4	0	15.4	0	0	0	1	0	0	0	10.9	0	0	0	0	0.707792	0	0	0	1	4	1	0	3.8961	15.5844	3.8961	0
Z	dihydronepetalactone	100	2019-01-13	25	22	0	22	0	0	0	1	0	0	0	19.8	0	0	0	0	0.9	0	0	0	0	2	0	0	0	5.45455	0	0
Z	dihydronepetalactone	900	2019-01-13	50	49.5	0	42.4	7.1	0	0	0.856566	0.143434	0	0	47.5	0	0	0	0	0.959596	0	0	0	1	5	1	2	1.21212	6.06061	1.21212	2.42424
Z	dihydronepetalactone	100	2019-01-13	62	55.5	0	54.1	1.4	0	0	0.974775	0.0252252	0	0	49.1	0	0	0	0	0.884685	0	0	0	0	2	1	4	0	2.16216	1.08108	4.32432
Z	isoiridomyrmecin	900	2019-01-13	15	15.7	0	15.7	0	0	0	1	0	0	0	13.1	0	0	0	0	1	0	0	0	0	1	1	0	0	3.82166	3.82166	0
Z	isoiridomyrmecin	33	2019-01-01	24	23.5	0	17.6	5.9	0	0	0.748936	0.251064	0	0	21.8	0	0	0	0	0.92766	0	0	0	0	2	1	2	0	5.10638	2.55319	5.10638
Z	isoiridomyrmecin	33	2019-01-01	43	36.8	0	31.4	5.4	0	0	0.853261	0.146739	0	0	38.9	0	0	0	0	1	0	0	0	1	3	1	2	1.63043	4.8913	1.63043	3.26087
Z	neonepetalactone	300	2019-10-13	17	16.9	0	16.9	0	0	0	1	0	0	0	14.9	0	0	0	0	0.881657	0	0	0	1	3	0	1	3.5503	10.6509	0	3.5503
Z	neonepetalactone	100	2019-10-09	33	28.1	0	25	3.1	0	0	0.88968	0.11032	0	0	28	0	0	0	0	0.996441	0	0	0	0	0	1	0	0	0	2.13523	0
Z	neonepetalactone	100	2019-10-19	34	32.2	0	32.2	0	0	0	1	0	0	0	29.2	0	0	0	0	0.906832	0	0	0	0	3	0	0	0	5.59006	0	0
Z	actinidine	300	2019-05-05	16	8.7	0	8.7	0	0	0	1	0	0	0	6.1	0	0	0	0	0.701149	0	0	0	0	2	1	2	0	13.7931	6.89655	13.7931
Z	actinidine	100	2019-01-09	12	11.4	0	8.1	3.3	0	0	0.710526	0.289474	0	0	9.5	0	0	0	0	0.833333	0	0	0	1	2	1	0	5.26316	10.5263	5.26316	0
Z	actinidine	33	2019-01-01	22	18.6	0	18.6	0	0	0	1	0	0	0	14.1	0	0	0	0	0.758065	0	0	0	1	6	0	1	3.22581	19.3548	0	3.22581
Z	actinidine	33	2019-05-01	57	48.3	0	45.4	2.9	0	0	0.939959	0.0600414	0	0	32.7	0	0	0	0	0.677019	0	0	0	2	10	6	0	2.48447	12.4224	7.45342	0
Z	dihydroactinidiolide	100	2020-07-05	66	66.2	0	66.2	0	0	0	1	0	0	0	65.9	0	0	0	0	0.995468	0	0	0	2	5	1	1	1.81269	4.53172	0.906344	0.906344
